# Supplementary material for: Computational evidence to design an appropriate candidate for the treatment of Alzheimer's disease through replacement of the heptamethylene linker of bis(7)tacrine with S-allylcysteine
Source: Royal Society of Chemistry journal article supplement (doi:10.1039/c5ra11346f), 2015-01-01
Supplement: c5ra11346f1.pdf [file c5ra11346f1.pdf]

## Supplementary data

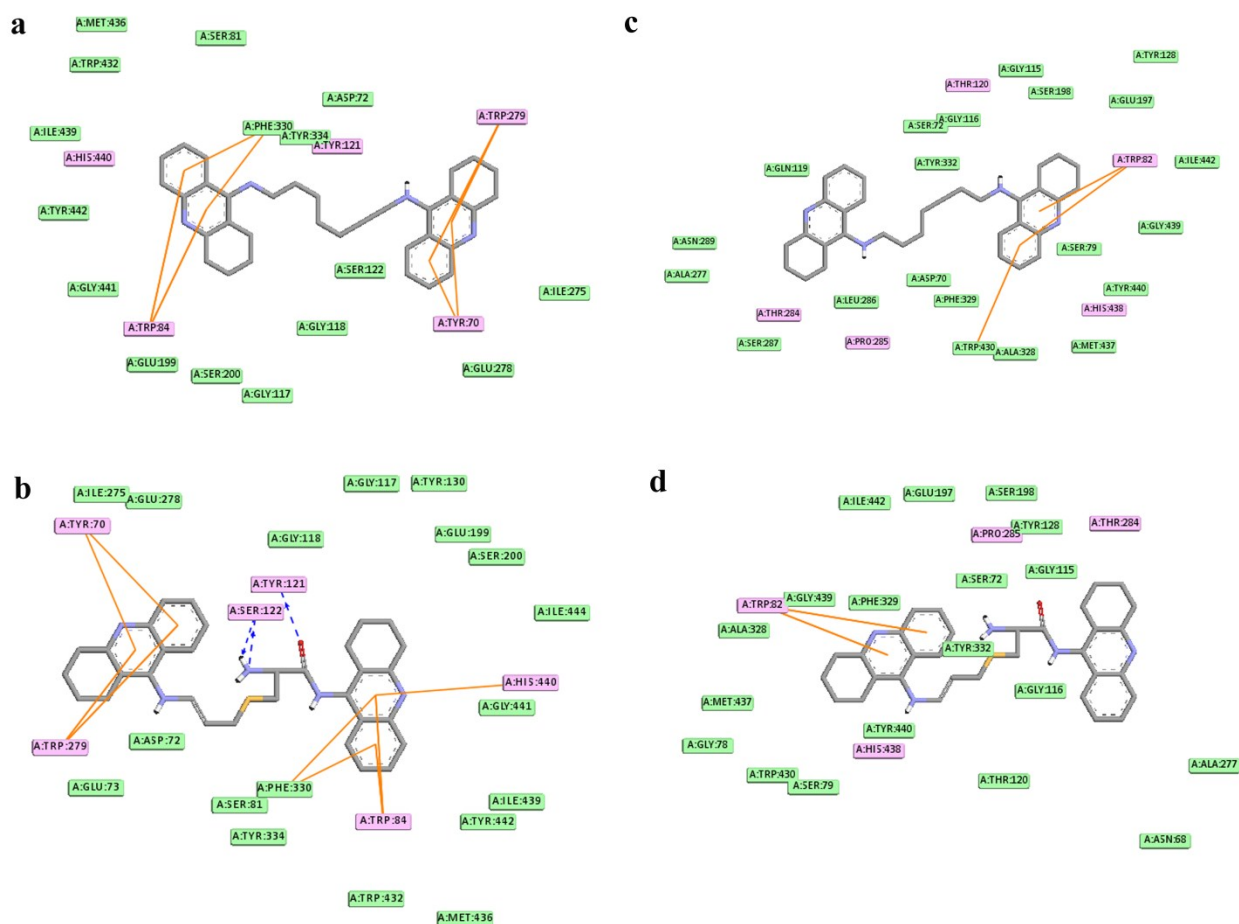

**Figure S1:** Two-dimensional representations of the observed interactions between both enzymes and both ligands after docking procedure; residues in a green frame: van der Waals interaction, residues in a magenta frame: electrostatic interaction, Orange lines:  $\pi$ - $\pi$  interaction, blue dashed line with arrow at H-bond acceptor: hydrogen bond with amino acid side-chain; (a) AChE-bis(7)tacrine, (b) AChE-bis(7)tacrine(7)-SAC, (c) AChE-bis(7)tacrine, (d) BChE-bis(7)tacrine-SAC.
